# Supplementary material for: Molecular profiling of lung adenosquamous carcinoma: hybrid or genuine type?
Source: PubMed Central journal article supplement (PMC4695160; doi:10.18632/oncotarget.4163), 2015-06-03
Supplement: oncotarget-06-23905-s001.pdf [file oncotarget-06-23905-s001.pdf]

**SUPPLEMENTARY FIGURE AND TABLES**

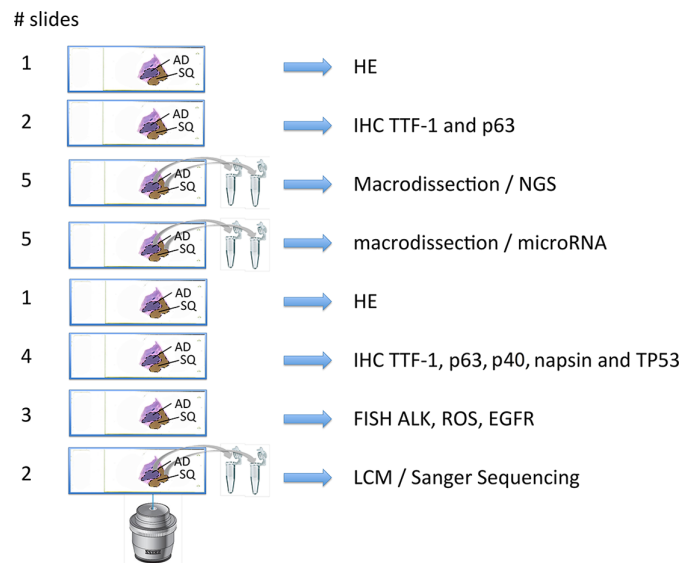

**Supplementary Figure 1: Serial tissue sections of ADSQ.**

**Supplementary Table 1: Patient characteristics**

|                 |            | <i>N</i> = 16 | %  |
|-----------------|------------|---------------|----|
| Median age      |            |               |    |
|                 | years      | 75.7          |    |
|                 | range      | 57–84         |    |
| Gender          |            |               |    |
|                 | Male       | 12            | 75 |
|                 | Female     | 4             | 25 |
| TNM             |            |               |    |
|                 | pT1 pN0    | 2             | 15 |
|                 | pT1 pN1    | 1             | 8  |
|                 | pT2 pN0    | 4             | 30 |
|                 | pT2 pN2    | 3             | 23 |
|                 | pT3 pN0    | 1             | 8  |
|                 | pT3 pN1    | 1             | 8  |
|                 | pT4 pN0    | 1             | 8  |
| Differentiation |            |               |    |
|                 | well       | 1             | 7  |
|                 | moderately | 11            | 73 |
|                 | poorly     | 3             | 20 |

Supplementary Table 2: Mutations identified by NGS

| Tumor # | Gene   | coverage AD/SQ | allele freq AD/SQ (%) | fold diff <sup>1</sup> | cDNA/gDNA                      | Protein                           | specificity |
|---------|--------|----------------|-----------------------|------------------------|--------------------------------|-----------------------------------|-------------|
| 1       | DDR2   | 1605/1297      | 62/31                 | 2                      | c.1323G > A                    | p.M441I <sup>2</sup>              | -           |
| 1       | EGFR   | 2210/2459      | 43/52                 | 1                      | c.2234_2245del<br>AGGAATTAAGAG | p.E746_<br>E749del <sup>2,3</sup> | ADSQ        |
| 2       | EGFR   | 3979/2359      | 22/67                 | 3                      | c.2573T > G                    | p.L858R <sup>2,3</sup>            | ADSQ        |
| 3       | APC    | 1209/972       | 23/16                 | 1                      | c.4106C > T                    | p.P1369V <sup>2,3</sup>           | ADSQ        |
| 3       | TP53   | 2312/1517      | 26/27                 | 1                      | c.715A > G                     | p.N239D <sup>2,3</sup>            | ADSQ        |
| 4       | PIK3CA | 2856/4014      | 8/1.6                 | 5                      | c.1633G > A                    | p.E545R <sup>3</sup>              | AD          |
| 4       | TP53   | 1824/2494      | 26/0                  | > 10                   | c.464C > T                     | p.T155I <sup>2,3</sup>            | AD          |
| 4       | TP53   | 3694/4481      | 5/62                  | > 10                   | c.377A > G                     | p.Y126C <sup>2,3</sup>            | SQ          |
| 5       | STK11  | 1499/1083      | 34/8                  | 4                      | chr19:1,220,371G > C           | SV E4 <sup>2,3</sup>              | ADSQ        |
| 5       | CDKN2A | 564/386        | 49/0                  | > 10                   | c.329G > A                     | p.W110* <sup>2,3</sup>            | AD          |
| 6       | EGFR   | 866/2055       | 52/18                 | 3                      | c.2573T > G                    | p.L858R <sup>2,3</sup>            | ADSQ        |
| 7       | APC    | 1281/2035      | 55/49                 | 1                      | c.3949G > C                    | p.E1317Q <sup>3</sup>             | ADSQ        |
| 7       | JAK3   | 862/863        | 38/34                 | 1                      | c.2164G > A                    | p.V722I <sup>2,3</sup>            | ADSQ        |
| 8       | TP53   | 4421/3587      | 66/59                 | 1                      | c.747G > T                     | p.R249S <sup>2,3</sup>            | ADSQ        |
| 8       | CDKN2A | 220/660        | 39/31                 | 1                      | c.251A > G                     | p.D84G <sup>2,3</sup>             | ADSQ        |
| 9       | TP53   | 1896/1744      | 47/46                 | 1                      | chr17:7578291A > T             | SV E6 <sup>2,3</sup>              | ADSQ        |
| 10      | PIK3CA | 2021/2345      | 3/30                  | 10                     | c.1633G > A                    | p.E545K <sup>2,3</sup>            | SQ          |
| 12      | PIK3CA | 2636/2966      | 86/75                 | 1                      | c.1258T > C                    | p.C420R <sup>2,3</sup>            | ADSQ        |
| 12      | RB1    | 1018/1824      | 58/29                 | 2                      | c.1713_1714insTT               | p.L572fs* <sup>392,3</sup>        | ADSQ        |
| 12      | EGFR   | 1686/1919      | 34/27                 | 1                      | c.2573T > G                    | p.L858R <sup>2,3</sup>            | ADSQ        |
| 12      | KIT    | 2687/3006      | 61/57                 | 1                      | c.1621A > C                    | p.M541L <sup>2</sup>              | -           |
| 13      | TP53   | 2732/2583      | 11/44                 | 4                      | c.569C > T                     | p.P190L <sup>2,3</sup>            | SQ          |
| 14      | KIT    | 175/400        | 44/63                 | 1                      | c.1621A > C                    | p.M541L <sup>2,3</sup>            | ADSQ        |
| 15      | KIT    | 400/3711       | 45.8/81.1             | 2                      | c.1621A > C                    | p.M541L <sup>2,3</sup>            | ADSQ        |
| 16      | EGFR   | 459/397        | 87.3/86.4             | 1                      | c.2573T > G                    | p.L858R <sup>2,3</sup>            | ADSQ        |
| 16      | RB1    | 192/100        | 32.3/0                | > 10                   | c.603_604insG                  | p.G203fs* <sup>2,3,8</sup>        | AD          |
| 16      | PTEN   | 0/290          | 0/19                  | > 10                   | c.511C > T                     | p.Q171* <sup>2,3</sup>            | SQ          |
| 16      | TP53   | 400/400        | 67.5/58.5             | 1                      | c.814G > A                     | p.V272M <sup>2,3</sup>            | ADSQ        |

<sup>1</sup>fold difference of allele frequency of AD and SQ components<sup>2</sup>confirmed by Sanger sequencing<sup>3</sup>somatic mutation
